# Supplementary material
Source: publisher figshare collection journal article supplement (https://sage.figshare.com/ndownloader/files/20333454)
Supplement: Supplementary file 1 [file 20333454]

**Supplementary material: Table 1 Supplementary**

| **Center Name** | **Approval Date** | **Registry nr.** | **EC name** |
| --- | --- | --- | --- |
| AOOR Papardo-Piemonte - Oncologia Medica | 25/02/2013 | 109/CE | Comitato Etico AO Ospedali Riuniti Papardo Piemonte di Messina |
| Oncologia Medica AO Cannizzaro - SC Senologia - Dip Materno-infantile | 05/06/2013 | - | Comitato Etico AO Ospedale per l'Emergenza Cannizzaro di Catania |
| Ospedale Buccheri La Ferla - Fatebenefratelli - UOC oncologia medica | 26/07/2013 | 55/2013/C.B. | Comitato di Bioetica Ordine Ospedaliero di San Giovanni di Dio - Fatebenefratelli |
| ASP Trapani S. Antonio Abate - Dip. oncologia | 26/06/2013 | - | Comitato Etico dell'Azienda Sanitaria Provinciale di Catania |
| Fondazione Istituto San Raffaele - Giglio - Dip. Oncologia | 23/05/2013 | C.E. 2013/68 | Comitato Etico Fondazione Istituto San Raffaele - G. Giglio di Cefalù |
| Ospedali Riuniti Villa Sofia-Cervello - Oncologia Medica | 19/06/2013 | - | Comitato Etico A.O. Ospedali Riuniti Villa Sofia Cervello di Palermo |
| UOC Oncologia Medica - ASP 7 Ragusa | 05/07/2013 | 77/13 | Comitato Etico dell'Azienda Sanitaria Provinciale di Ragusa |
| Ospedale San Giovanni di Dio - UOC Oncologia medica | 26/06/2013 | - | Comitato Etico dell'Azienda Sanitaria Provinciale di Agrigento |
| Istituto oncologico del Mediterraneo - Oncologia medica | 10/09/2013 | - | Comitato Etico dell'Azienda Sanitaria Provinciale di Catania |
| AO Garibaldi-Nesima - UO Oncologia medica | 30/05/2013 | 37/CE/2013 | Comitato Etico A.O.R.N. Garibaldi di Catania |
| Arnas Civico Palermo - Oncologia medica | 28/10/2013 | 502/1 | Comitato di Bioetica A.R.N.A.S. Civico Di Cristina Benfratelli di Palermo |
| AOUP Paolo Giaccone - UOC di Oncologia Medica | 11/12/2013 |  | Comitato Etico AOU Paolo Giaccone di Palermo |
| AO Gravina e Santo Pietro - UO Oncologia | 10/09/2013 | - | Comitato Etico dell'Azienda Sanitaria Provinciale di Catania |
| Humanitas Centro Catanese Di Oncologia - Oncologia Medica | 10/09/2013 | - | Comitato Etico dell'Azienda Sanitaria Provinciale di Catania |
| Casa di Cura “Villa Salus” - UO di Oncologia ed Ematologia | 17/03/2014 | - | Comitato Etico Interaziendale della Provincia di Messina |
| Casa di Cura La Maddalena - Oncologia Medica | 19/05/2014 |  | Comitato Etico Palermo 1 |
| AOU Policlinico Vittorio Emanuele - PO G. Rodolico - Oncologia medica | 16/07/2013 | 690 | Comitato Etico AOU Policlinico Vittorio Emanuele di Catania |
| CCD GB Morgani | 10/09/2013 | - | Comitato Etico dell'Azienda Sanitaria Provinciale di Catania |
| Ospedale “Barone Lombardo” - Oncologia | 26/06/2013 |  | Comitato Etico dell'Azienda Sanitaria Provinciale di Agrigento |
| Ospedale San Vincenzo - UOC Oncologia medica | 17/03/2014 | - | Comitato Etico Interaziendale della Provincia di Messina |
| Unità operativa complessa di Oncologia medica “M. Cammarata” | 11/11/2014 | 733/CE | Comitato Etico A.O.R.N. Garibaldi di Catania |
